# Supplementary material for: Cross talk between Wnt/β-catenin and Irf8 in leukemia progression and drug resistance
Source: PubMed Central journal article supplement — J Exp Med. 2013 Oct 21;210(11):2239–56. doi: 10.1084/jem.20130706 (PMC3804946; doi:10.1084/jem.20130706), 2013-10-21
Supplement: supp_jem.20130706_JEM_20130706_sm.pdf [file supp_jem.20130706_JEM_20130706_sm.pdf]

## SUPPLEMENTAL MATERIAL

Scheller et al., <http://www.jem.org/cgi/content/full/jem.20130706/DC1>**Table S1.** Primers for RT-PCR

| Gene             | Primer                                                     |
|------------------|------------------------------------------------------------|
| <i>Irf8</i>      | (f) 5-GCTGATCAAGGAACCTTGTG-3<br>(r) 5-CAGGCCTGCACTGGGCTG-3 |
| <i>Cebpa</i>     | (f) 5-TGCTGGAGTTGAGTGAC-3<br>(r) 5-CTTGACCAAGGAGCTCTCAG-3  |
| <i>Sfpi/Pu.1</i> | (f) 5-GTCACCAGGTTTCTACATGC-3<br>(r) 5-CTCTGCCTCTACCCTCCT-3 |
| <i>Bcl2</i>      | (f) 5-GAGGCTGGGATGCCTTGT-3<br>(r) 5-AGGCTGAGCAGGGTCTTCAG-3 |
| <i>Actb</i>      | (f) 5-GACGGCCAGGTCATATTG-3<br>(r) 5-AGGAAGGCTGGAAAAGAGCC-3 |

f, forward; r, reverse.

**Table S2.** Primers for TaqMan

| Gene             | Primer                                                                                                        |
|------------------|---------------------------------------------------------------------------------------------------------------|
| <i>Irf8</i>      | FW: 5'-CAGGCCTGCCACTGGTG-3'<br>RV: 5'-CCACTGGGAGAAAGCTGAATG-3'<br>Probe: 6FAM-CCGGATATGCCGCCTATGACACACA-TAMRA |
| <i>Sfpi/Pu.1</i> | FW: 5'-AGAAGCTGATGGCTTGAGC-3'<br>RV: 5'-GCGAATCTTTTCTTGCTGCC-3'<br>Probe: FAM-TGGGCCAGGCTTCTGCACGG-TAMRA      |
| <i>Cebpa</i>     | Mm00514283 (ABI)                                                                                              |
| <i>Actb</i>      | 4352341E (ABI)                                                                                                |

FW, forward; RV, reverse.
